# Supplementary material for: Characteristics of Shiga Toxin-Producing Escherichia coli Circulating in Asymptomatic Food Handlers
Source: MDPI journal article supplement (doi:10.3390/toxins15110640), 2023-11-02
Supplement: s1 [file s1]

Table S1. Characterization of 14 Stx prophages in this study.

| Strain   | Stx subtype  | Lenth(bp) | GC content | No. of CDS | tRNA |
|----------|--------------|-----------|------------|------------|------|
| STEC434  | <i>stx2d</i> | 49648     | 52.1       | 72         | 3    |
| STEC435  | <i>stx1a</i> | 48828     | 49.6       | 71         | 0    |
| STEC435  | <i>stx2b</i> | 46213     | 52.7       | 61         | 1    |
| STEC438  | <i>stx1c</i> | 64251     | 49.7       | 79         | 0    |
| STEC509  | <i>stx2e</i> | 55219     | 48.9       | 89         | 3    |
| STEC1585 | <i>stx1c</i> | 62413     | 49.7       | 77         | 0    |
| STEC1586 | <i>stx1c</i> | 62816     | 49.6       | 85         | 0    |
| STEC1586 | <i>stx2b</i> | 46072     | 53.4       | 64         | 1    |
| STEC1587 | <i>stx1a</i> | 45826     | 52.3       | 65         | 0    |
| STEC1588 | <i>stx1a</i> | 48278     | 50.9       | 72         | 0    |
| STEC1588 | <i>stx2a</i> | 45120     | 52.5       | 63         | 3    |
| STEC1589 | <i>stx1c</i> | 63085     | 49.6       | 82         | 0    |
| STEC1590 | <i>stx1c</i> | 62821     | 49.6       | 81         | 0    |
| STEC1590 | <i>stx2b</i> | 47889     | 53.1       | 65         | 1    |

“-”, The insertion site is undetermined

| Insertion site |
|----------------|
| <i>yccA</i>    |
| <i>yecE</i>    |
| <i>yfhL</i>    |
| <i>dmsB</i>    |
| <i>yecE</i>    |
| <i>wrbA</i>    |
| <i>dmsB</i>    |
| <i>yfhL</i>    |
| <i>potC</i>    |
| -              |
| <i>dusA</i>    |
| <i>dmsB</i>    |
| <i>dmsB</i>    |
| <i>yfhL</i>    |
